# Supplementary material for: Epistasis in genomic and survival data of cancer patients
Source: PLoS Comput Biol. 2017 Jul 5;13(7):e1005626. doi: 10.1371/journal.pcbi.1005626 (PMC5517071; doi:10.1371/journal.pcbi.1005626)
Supplement: S3 Table — Gene pairs (columns gene1, gene2), whose synthetic lethal interaction was previously investigated using siRNA screens on cancer cell lines. Column flag denotes whether the pair is synthetic lethal (value 1) or not (0). (CSV) [file pcbi.1005626.s006.csv]

	gene1	gene2	flag
1	BRCA1	PARP1	1
2	BRCA2	PARP1	1
3	PNKP	PARP1	1
4	ATR	PARP1	1
5	TTBK1	PARP1	0
6	STK36	PARP1	1
7	PLK1	PARP1	0
8	STK35	PARP1	0
9	ADRA1A	PARP1	0
10	PIP4K2B	PARP1	0
11	PLK3	PARP1	1
12	ITGB1BP1	PARP1	0
13	TSSK3	PARP1	1
14	AKAP1	PARP1	0
15	MLKL	PARP1	0
16	GSK3A	PARP1	0
17	CHEK1	PARP1	0
18	CDK5	PARP1	1
19	ATM	PARP1	1
20	MAPK12	PARP1	1
21	PMVK	PARP1	0
22	DAPK1	PARP1	0
23	ACAD10	PARP1	0
24	PRKD2	PARP1	0
25	CDK14	PARP1	0
26	CSNK1G1	PARP1	0
27	BCKDK	PARP1	0
28	CDC42BPG	PARP1	0
29	PDK4	PARP1	0
30	AMHR2	PARP1	0
31	PRKAR2A	PARP1	0
32	NME3	PARP1	0
33	AK7	PARP1	0
34	HK2	PARP1	0
35	WEE1	PARP1	0
36	PTK7	PARP1	0
37	PRPS1	PARP1	0
38	AURKC	PARP1	0
39	SPA17	PARP1	0
40	STRADA	PARP1	0
41	LMTK3	PARP1	0
42	AKAP8	PARP1	0
43	SCYL3	PARP1	0
44	BDKRB2	PARP1	0
45	CAMK4	PARP1	0
46	CDC42SE2	PARP1	0
47	DGKE	PARP1	0
48	SMG1	PARP1	0
49	MECOM	PARP1	0
50	IP6K3	PARP1	0
51	FGR	PARP1	0
52	CNKSR1	PARP1	0
53	MYLK2	PARP1	0
54	RAC1	PARP1	0
55	MRC2	PARP1	0
56	SPHK1	PARP1	0
57	CAMK1	PARP1	0
58	PFKFB3	PARP1	0
59	TESK1	PARP1	0
60	CRKL	PARP1	0
61	RPS6KA4	PARP1	0
62	PPP2CA	PARP1	0
63	TTBK2	PARP1	0
64	PSKH1	PARP1	0
65	ERBB4	PARP1	0
66	VRK1	PARP1	0
67	AKT2	PARP1	0
68	DCK	PARP1	0
69	CSNK2A2	PARP1	0
70	CLK3	PARP1	0
71	AKAP11	PARP1	0
72	PAG1	PARP1	0
73	CALM3	PARP1	0
74	SRMS	PARP1	0
75	ULK1	PARP1	0
76	MAPK6	PARP1	0
77	MERTK	PARP1	0
78	AVPR1B	PARP1	0
79	RAPGEF3	PARP1	0
80	DGKA	PARP1	0
81	CSNK2A1	PARP1	0
82	MPP3	PARP1	0
83	PRKCB	PARP1	0
84	DGKQ	PARP1	0
85	MAP4K1	PARP1	0
86	MARK3	PARP1	0
87	MAP2K1	PARP1	0
88	KSR2	PARP1	0
89	CSNK2B	PARP1	0
90	EPHB2	PARP1	0
91	CAMK2B	PARP1	0
92	CDK9	PARP1	0
93	TWF2	PARP1	0
94	PIK3C2A	PARP1	0
95	EXOSC10	PARP1	0
96	CSNK1D	PARP1	0
97	PRKG2	PARP1	0
98	RPS6KL1	PARP1	0
99	MAST3	PARP1	0
100	SHPK	PARP1	0
101	GCK	PARP1	0
102	AVPR1A	PARP1	0
103	AURKA	PARP1	0
104	PIP5K1A	PARP1	0
105	PKN2	PARP1	0
106	DDR1	PARP1	0
107	CDK20	PARP1	0
108	MST1R	PARP1	0
109	PFKFB2	PARP1	0
110	NEK3	PARP1	0
111	TSSK2	PARP1	0
112	IKBKB	PARP1	0
113	NEK7	PARP1	0
114	PRKCH	PARP1	0
115	PIP5KL1	PARP1	0
116	UCK1	PARP1	0
117	AKAP3	PARP1	0
118	PRPSAP1	PARP1	0
119	ILK	PARP1	0
120	EPHB6	PARP1	0
121	VRK2	PARP1	0
122	MAP2K7	PARP1	0
123	MAK	PARP1	0
124	RPS6KA1	PARP1	0
125	PHKG1	PARP1	0
126	MARK2	PARP1	0
127	STK24	PARP1	0
128	GRK6	PARP1	0
129	TGFBR1	PARP1	0
130	YWHAH	PARP1	0
131	MUSK	PARP1	0
132	PANK4	PARP1	0
133	COPB2	PARP1	0
134	PANK1	PARP1	0
135	SQSTM1	PARP1	0
136	ACVR1B	PARP1	0
137	PIK3CB	PARP1	0
138	WNK4	PARP1	0
139	CDK11B	PARP1	0
140	HCK	PARP1	0
141	SPEG	PARP1	0
142	ULK2	PARP1	0
143	NLK	PARP1	0
144	CSNK1A1L	PARP1	0
145	GSG2	PARP1	0
146	LAMTOR3	PARP1	0
147	CDKL1	PARP1	0
148	TLK2	PARP1	0
149	TRIB3	PARP1	0
150	GRK7	PARP1	0
151	HK1	PARP1	0
152	PDLIM5	PARP1	0
153	TRIB1	PARP1	0
154	MARK4	PARP1	0
155	MAPK15	PARP1	0
156	RIOK1	PARP1	0
157	AZU1	PARP1	0
158	KIT	PARP1	0
159	RIPK3	PARP1	0
160	STK32A	PARP1	0
161	MKNK1	PARP1	0
162	STK17B	PARP1	0
163	PFKL	PARP1	0
164	TNK1	PARP1	0
165	SIK1	PARP1	0
166	MYO3A	PARP1	0
167	PFKM	PARP1	0
168	NME1	PARP1	0
169	CAMKK1	PARP1	0
170	ETNK2	PARP1	0
171	NEK1	PARP1	0
172	FLT4	PARP1	0
173	DAPK3	PARP1	0
174	CSNK1E	PARP1	0
175	FN3KRP	PARP1	0
176	CXCL10	PARP1	0
177	AK1	PARP1	0
178	CDKN1C	PARP1	0
179	CKMT2	PARP1	0
180	FASTK	PARP1	0
181	EIF2AK4	PARP1	0
182	CKM	PARP1	0
183	EDN2	PARP1	0
184	GAK	PARP1	0
185	CDK17	PARP1	0
186	TRIM27	PARP1	0
187	NADK	PARP1	0
188	IRAK2	PARP1	0
189	TRAT1	PARP1	0
190	MTOR	PARP1	0
191	AATK	PARP1	0
192	ADRB2	PARP1	0
193	PRKG1	PARP1	0
194	MINK1	PARP1	0
195	STK39	PARP1	0
196	PDK2	PARP1	0
197	MAPK11	PARP1	0
198	IKBKE	PARP1	0
199	AK2	PARP1	0
200	FES	PARP1	0
201	PRKAG3	PARP1	0
202	ROR2	PARP1	0
203	GRK4	PARP1	0
204	SKAP1	PARP1	0
205	PIK3R2	PARP1	0
206	COASY	PARP1	0
207	DDR2	PARP1	0
208	PRKCZ	PARP1	0
209	PRKACG	PARP1	0
210	NEK2	PARP1	0
211	PFKFB1	PARP1	0
212	RPS6KB2	PARP1	0
213	EEF2K	PARP1	0
214	ERN1	PARP1	0
215	ACVR2A	PARP1	0
216	DUSP2	PARP1	0
217	DYRK2	PARP1	0
218	IL2	PARP1	0
219	DUSP22	PARP1	0
220	RPS6KA2	PARP1	0
221	RPS6KA3	PARP1	0
222	IP6K1	PARP1	0
223	ALK	PARP1	0
224	ETNK1	PARP1	0
225	DGUOK	PARP1	0
226	ANGPT4	PARP1	0
227	MAP3K11	PARP1	0
228	CSNK1G3	PARP1	0
229	HUNK	PARP1	0
230	MAP3K3	PARP1	0
231	PRKRA	PARP1	0
232	CDK5R1	PARP1	0
233	PRPSAP2	PARP1	0
234	TAF1	PARP1	0
235	MAPK1	PARP1	0
236	STK10	PARP1	0
237	FLT3	PARP1	0
238	PI4K2A	PARP1	0
239	CAMKK2	PARP1	0
240	DGKG	PARP1	0
241	TAOK3	PARP1	0
242	PRKAR1A	PARP1	0
243	TYRO3	PARP1	0
244	PLK4	PARP1	0
245	COL4A3BP	PARP1	0
246	CCL2	PARP1	0
247	CDK3	PARP1	0
248	ACVR1C	PARP1	0
249	PXK	PARP1	0
250	PPP1R1B	PARP1	0
251	JAK1	PARP1	0
252	PKN1	PARP1	0
253	BCR	PARP1	0
254	CDKL5	PARP1	0
255	PASK	PARP1	0
256	GALK1	PARP1	0
257	HIPK4	PARP1	0
258	FYN	PARP1	0
259	CD4	PARP1	0
260	ADCK2	PARP1	0
261	CDK10	PARP1	0
262	MYLK	PARP1	0
263	MAP3K7	PARP1	0
264	BMPR2	PARP1	0
265	AK3	PARP1	0
266	PI4K2B	PARP1	0
267	PPP2CB	PARP1	0
268	JAK2	PARP1	0
269	WNK1	PARP1	0
270	RET	PARP1	0
271	CKB	PARP1	0
272	CKS2	PARP1	0
273	LTK	PARP1	0
274	PI4KB	PARP1	0
275	MAP3K9	PARP1	0
276	PRKCI	PARP1	0
277	DBF4	PARP1	0
278	EPHA8	PARP1	0
279	CDK5RAP3	PARP1	0
280	FUK	PARP1	0
281	GNE	PARP1	0
282	PIK3R1	PARP1	0
283	AKT1	PARP1	0
284	STK32B	PARP1	0
285	PRKD3	PARP1	0
286	DOK1	PARP1	0
287	BRAF	PARP1	0
288	PRKACA	PARP1	0
289	TLR3	PARP1	0
290	CARD14	PARP1	0
291	LIMK1	PARP1	0
292	CERK	PARP1	0
293	PRKCSH	PARP1	0
294	SLK	PARP1	0
295	CDKN2D	PARP1	0
296	SYK	PARP1	0
297	CDK4	PARP1	0
298	SCYL1	PARP1	0
299	INSR	PARP1	0
300	CDK18	PARP1	0
301	MAP3K4	PARP1	0
302	MAP3K14	PARP1	0
303	MAPK8IP1	PARP1	0
304	CDK15	PARP1	0
305	PGK1	PARP1	0
306	NEK11	PARP1	0
307	IRAK1	PARP1	0
308	NUAK2	PARP1	0
309	SGK3	PARP1	0
310	PAK6	PARP1	0
311	MAPK13	PARP1	0
312	CAMKV	PARP1	0
313	STK38	PARP1	0
314	MAP3K5	PARP1	0
315	STK16	PARP1	0
316	BMPR1B	PARP1	0
317	XYLB	PARP1	0
318	TAOK1	PARP1	0
319	MAP3K1	PARP1	0
320	IGF1R	PARP1	0
321	RIPK1	PARP1	0
322	MAP3K10	PARP1	0
323	HIPK2	PARP1	0
324	MAPK8IP3	PARP1	0
325	PRKAR2B	PARP1	0
326	NRBP1	PARP1	0
327	CSF1R	PARP1	0
328	NEK9	PARP1	0
329	SGK2	PARP1	0
330	UHMK1	PARP1	0
331	MOS	PARP1	0
332	MAP2K2	PARP1	0
333	TPK1	PARP1	0
334	STK33	PARP1	0
335	EPHB3	PARP1	0
336	RBKS	PARP1	0
337	ADRA1B	PARP1	0
338	TPD52L3	PARP1	0
339	AKAP7	PARP1	0
340	PANK3	PARP1	0
341	NPR2	PARP1	0
342	SRPK3	PARP1	0
343	STK25	PARP1	0
344	PIK3C2G	PARP1	0
345	DLG4	PARP1	0
346	MKNK2	PARP1	0
347	EIF2AK1	PARP1	0
348	TYK2	PARP1	0
349	SNRK	PARP1	0
350	TSKS	PARP1	0
351	TSSK1B	PARP1	0
352	TBCK	PARP1	0
353	RPS6KC1	PARP1	0
354	RASGRF2	PARP1	0
355	ADCK1	PARP1	0
356	GUCY2D	PARP1	0
357	GALK2	PARP1	0
358	FER	PARP1	0
359	EPHA5	PARP1	0
360	CDKN2C	PARP1	0
361	PSKH2	PARP1	0
362	PDK1	PARP1	0
363	CHKA	PARP1	0
364	MYO3B	PARP1	0
365	TESK2	PARP1	0
366	ACVR2B	PARP1	0
367	SEPHS1	PARP1	0
368	MVK	PARP1	0
369	PACSIN1	PARP1	0
370	EPHA7	PARP1	0
371	MAP2K3	PARP1	0
372	RP2	PARP1	0
373	IRAK3	PARP1	0
374	AK5	PARP1	0
375	PTPRR	PARP1	0
376	PICK1	PARP1	0
377	PTPN5	PARP1	0
378	STRADB	PARP1	0
379	CAMK1G	PARP1	0
380	TSSK6	PARP1	0
381	ITK	PARP1	0
382	UCK2	PARP1	0
383	MPZL1	PARP1	0
384	PIM2	PARP1	0
385	CDK13	PARP1	0
386	SOCS5	PARP1	0
387	BLK	PARP1	0
388	FN3K	PARP1	0
389	NEK8	PARP1	0
390	UCKL1	PARP1	0
391	NEK4	PARP1	0
392	PFKFB4	PARP1	0
393	PRPF4B	PARP1	0
394	AKAP6	PARP1	0
395	SIK3	PARP1	0
396	GFRA2	PARP1	0
397	TNK2	PARP1	0
398	MAPK4	PARP1	0
399	CDK11A	PARP1	0
400	PAK2	PARP1	0
401	CARD10	PARP1	0
402	CLK2	PARP1	0
403	MAP3K12	PARP1	0
404	NEK10	PARP1	0
405	AKAP4	PARP1	0
406	DYRK1B	PARP1	0
407	MAST2	PARP1	0
408	DUSP10	PARP1	0
409	KDR	PARP1	0
410	SPHK2	PARP1	0
411	MARCH4	PARP1	0
412	RNASEL	PARP1	0
413	SGK1	PARP1	0
414	PPP4C	PARP1	0
415	ZAP70	PARP1	0
416	DUSP6	PARP1	0
417	DUSP8	PARP1	0
418	MAPK7	PARP1	0
419	ACVRL1	PARP1	0
420	PIK3R3	PARP1	0
421	YWHAQ	PARP1	0
422	MAPK14	PARP1	0
423	DGKI	PARP1	0
424	MAP4K5	PARP1	0
425	CDK7	PARP1	0
426	TLK1	PARP1	0
427	CDKL2	PARP1	0
428	STK38L	PARP1	0
429	PDXK	PARP1	0
430	BMP2K	PARP1	0
431	RIPK4	PARP1	0
432	TTK	PARP1	0
433	IKBKAP	PARP1	0
434	TK1	PARP1	0
435	ACVR1	PARP1	0
436	PTK2	PARP1	0
437	NME4	PARP1	0
438	TWF1	PARP1	0
439	EPHA1	PARP1	0
440	PDK3	PARP1	0
441	ADK	PARP1	0
442	PINK1	PARP1	0
443	LRRK1	PARP1	0
444	AKAP13	PARP1	0
445	POMK	PARP1	0
446	DCLK2	PARP1	0
447	BMX	PARP1	0
448	IRS1	PARP1	0
449	CDK19	PARP1	0
450	SEPHS2	PARP1	0
451	FRK	PARP1	0
452	ULK4	PARP1	0
453	DGKD	PARP1	0
454	TLR1	PARP1	0
455	JAK3	PARP1	0
456	MAPK8	PARP1	0
457	GSK3B	PARP1	0
458	PKIA	PARP1	0
459	TNIK	PARP1	0
460	ADAM9	PARP1	0
461	TJP2	PARP1	0
462	PGK2	PARP1	0
463	CDK6	PARP1	0
464	TXK	PARP1	0
465	HSPB8	PARP1	0
466	CDC7	PARP1	0
467	OBSCN	PARP1	0
468	EPHA2	PARP1	0
469	LCK	PARP1	0
470	PRKCQ	PARP1	0
471	SIK2	PARP1	0
472	TKFC	PARP1	0
473	CSNK1G2	PARP1	0
474	DMPK	PARP1	0
475	IP6K2	PARP1	0
476	PAPSS1	PARP1	0
477	PAK1	PARP1	0
478	ABI1	PARP1	0
479	TAF1L	PARP1	0
480	MAP3K6	PARP1	0
481	CASK	PARP1	0
482	TRPM6	PARP1	0
483	CLK1	PARP1	0
484	STYK1	PARP1	0
485	MAP4K2	PARP1	0
486	BLNK	PARP1	0
487	AGTR2	PARP1	0
488	FGFR4	PARP1	0
489	ADCK5	PARP1	0
490	PKM	PARP1	0
491	PRPS1L1	PARP1	0
492	TLR6	PARP1	0
493	NEK6	PARP1	0
494	DAPK2	PARP1	0
495	PRKD1	PARP1	0
496	WNK3	PARP1	0
497	NTRK2	PARP1	0
498	MELK	PARP1	0
499	PHKA2	PARP1	0
500	COQ8B	PARP1	0
501	PRKAA2	PARP1	0
502	GRK5	PARP1	0
503	MAP4K4	PARP1	0
504	PDPK1	PARP1	0
505	PRKDC	PARP1	0
506	AAK1	PARP1	0
507	GUCY2C	PARP1	0
508	ROR1	PARP1	0
509	MBIP	PARP1	0
510	MAPK9	PARP1	0
511	MAPK8IP2	PARP1	0
512	FGFR1	PARP1	0
513	MAP3K8	PARP1	0
514	CCL4	PARP1	0
515	TP53RK	PARP1	0
516	MAPK10	PARP1	0
517	MAP3K2	PARP1	0
518	DCLK1	PARP1	0
519	TRIO	PARP1	0
520	CDK8	PARP1	0
521	RPS6KA5	PARP1	0
522	EPHA4	PARP1	0
523	BRDT	PARP1	0
524	PAK3	PARP1	0
525	CDKL3	PARP1	0
526	FLT1	PARP1	0
527	THNSL1	PARP1	0
528	OSR1	PARP1	0
529	HK3	PARP1	0
530	UGP2	PARP1	0
531	EPHB4	PARP1	0
532	GMFG	PARP1	0
533	ARL4C	PARP1	0
534	TRIB2	PARP1	0
535	CAMK2G	PARP1	0
536	TEK	PARP1	0
537	FGFR3	PARP1	0
538	STK26	PARP1	0
539	PKIB	PARP1	0
540	PRPS2	PARP1	0
541	PRKAG1	PARP1	0
542	DUSP1	PARP1	0
543	STK40	PARP1	0
544	ICK	PARP1	0
545	PCK1	PARP1	0
546	PKN3	PARP1	0
547	PRKCE	PARP1	0
548	BRSK2	PARP1	0
549	AKAP5	PARP1	0
550	NME2	PARP1	0
551	PAK4	PARP1	0
552	STK3	PARP1	0
553	MAP2K6	PARP1	0
554	MVD	PARP1	0
555	NTRK3	PARP1	0
556	RIOK3	PARP1	0
557	EGFR	PARP1	0
558	KALRN	PARP1	0
559	PIK3CA	PARP1	0
560	DYRK4	PARP1	0
561	ERBB2	PARP1	0
562	CDC42BPA	PARP1	0
563	PI4KA	PARP1	0
564	MAPKAPK2	PARP1	0
565	PAPSS2	PARP1	0
566	MAPKAPK5	PARP1	0
567	ALPK2	PARP1	0
568	FXN	PARP1	0
569	KHK	PARP1	0
570	GMFB	PARP1	0
571	GTF2H1	PARP1	0
572	DYRK3	PARP1	0
573	EPHB1	PARP1	0
574	DLG1	PARP1	0
575	CDK12	PARP1	0
576	DUSP4	PARP1	0
577	TGFBR2	PARP1	0
578	CINP	PARP1	0
579	NME8	PARP1	0
580	PAK5	PARP1	0
581	EPHA3	PARP1	0
582	DGKB	PARP1	0
583	ILKAP	PARP1	0
584	CDADC1	PARP1	0
585	AKT3	PARP1	0
586	AGK	PARP1	0
587	PCK2	PARP1	0
588	MALT1	PARP1	0
589	HIPK3	PARP1	0
590	PFKP	PARP1	0
591	LATS1	PARP1	0
592	SRC	PARP1	0
593	MAPKAPK3	PARP1	0
594	CDK5R2	PARP1	0
595	CHUK	PARP1	0
596	MATK	PARP1	0
597	PRKX	PARP1	0
598	PTK6	PARP1	0
599	PIM1	PARP1	0
600	RPS6KA6	PARP1	0
601	DYRK1A	PARP1	0
602	FGFR2	PARP1	0
603	TTN	PARP1	0
604	CAMK1D	PARP1	0
605	INSRR	PARP1	0
606	PKMYT1	PARP1	0
607	IQCH	PARP1	0
608	BTK	PARP1	0
609	CLK4	PARP1	0
610	BRSK1	PARP1	0
611	TEX14	PARP1	0
612	SOCS1	PARP1	0
613	PDGFRA	PARP1	0
614	LMTK2	PARP1	0
615	TBK1	PARP1	0
616	BUB1	PARP1	0
617	MAP4K3	PARP1	0
618	PLK2	PARP1	0
619	ABL1	PARP1	0
620	DNAJC3	PARP1	0
621	CDK5RAP1	PARP1	0
622	LIMK2	PARP1	0
623	PIP4K2A	PARP1	0
624	SRPK2	PARP1	0
625	CSNK1A1	PARP1	0
626	PTPRT	PARP1	0
627	PIK3C2B	PARP1	0
628	ALDH18A1	PARP1	0
629	HIPK1	PARP1	0
630	GRK1	PARP1	0
631	STK32C	PARP1	0
632	FYB	PARP1	0
633	RFK	PARP1	0
634	RPS6KB1	PARP1	0
635	VRK3	PARP1	0
636	MAP3K13	PARP1	0
637	APPL1	PARP1	0
638	CSK	PARP1	0
639	TEC	PARP1	0
640	DUSP5	PARP1	0
641	MPP2	PARP1	0
642	TK2	PARP1	0
643	WNK2	PARP1	0
644	ABL2	PARP1	0
645	MAGI3	PARP1	0
646	AXL	PARP1	0
647	ITPK1	PARP1	0
648	STK19	PARP1	0
649	NTRK1	PARP1	0
650	PRKAA1	PARP1	0
651	PDGFRB	PARP1	0
652	SRPK1	PARP1	0
653	ROS1	PARP1	0
654	STK4	PARP1	0
655	ULK3	PARP1	0
656	PITPNM3	PARP1	0
657	RAF1	PARP1	0
658	ARAF	PARP1	0
659	PIP4K2C	PARP1	0
660	ANKK1	PARP1	0
661	MAP3K19	PARP1	0
662	STK31	PARP1	0
663	CDKN1B	PARP1	0
664	CMPK1	PARP1	0
665	STK17A	PARP1	0
666	LCP2	PARP1	0
667	MAP2K5	PARP1	0
668	PHKG2	PARP1	0
669	CHRM1	PARP1	0
670	PIK3CG	PARP1	0
671	RYK	PARP1	0
672	NME7	PARP1	0
673	CDK2	PARP1	0
674	CAMK2D	PARP1	0
675	AURKB	PARP1	0
676	MARK1	PARP1	0
677	NPR1	PARP1	0
678	MAP2K4	PARP1	0
679	BMPR1A	PARP1	0
680	WIF1	PARP1	0
681	NBEA	PARP1	0
682	CAMK2A	PARP1	0
683	PRKCA	PARP1	0
684	ERBB3	PARP1	0
685	GK2	PARP1	0
686	CKS1B	PARP1	0
687	CDK16	PARP1	0
688	RPRD1A	PARP1	0
689	EIF2AK2	PARP1	0
690	PTPRJ	PARP1	0
691	PRKACB	PARP1	0
692	NUAK1	PARP1	0
693	GK	PARP1	0
694	YES1	PARP1	0
695	TNFRSF10A	PARP1	0
696	PRKCD	PARP1	0
697	PIK3R4	PARP1	0
698	STK11	PARP1	0
699	DTYMK	PARP1	0
700	CDKN2B	PARP1	0
701	RIPK2	PARP1	0
702	PKLR	PARP1	0
703	SHC1	PARP1	0
704	NAGK	PARP1	0
705	MAPK3	PARP1	0
706	TIE1	PARP1	0
707	ROCK2	PARP1	0
708	PBK	PARP1	0
709	PHKA1	PARP1	0
710	LATS2	PARP1	0
711	KIF13B	PARP1	0
712	DLG3	PARP1	0
713	SMAD7	PARP1	0
714	NIM1K	PARP1	0
715	BUB1B	PARP1	0
716	ROCK1	PARP1	0
717	PTK2B	PARP1	0
718	GUCY2F	PARP1	0
719	GAP43	PARP1	0
720	EIF2AK3	PARP1	0
721	DUSP7	PARP1	0
722	TRPM7	PARP1	0
723	CD7	PARP1	0
724	NRG3	PARP1	0
725	MET	PARP1	0
726	NME5	PARP1	0
727	RAPGEF4	PARP1	0
728	BRD2	PARP1	0
729	LYN	PARP1	0
730	DLG2	PARP1	0
731	ITPKB	PARP1	0
732	CD3E	PARP1	0
733	MPP1	PARP1	0
734	GRK2	PARP1	0
735	GRK3	PARP1	0
736	DCLK3	PARP1	0
737	PTPRG	PARP1	0
738	DGKZ	PARP1	0
739	CDKN1A	PARP1	0
740	TNNI3K	PARP1	0
741	CHEK2	PARP1	0
742	PRKCG	PARP1	0
743	CHKB	PARP1	0
744	CIT	PARP1	0
745	ITPKC	PARP1	0
746	ITPKA	PARP1	0
747	MASTL	PARP1	0
748	NME6	PARP1	0
749	TLR4	PARP1	0
750	CDC42BPB	PARP1	0
751	GUK1	PARP1	0
752	CDKN3	PARP1	0
753	ACLY	PARP1	0
754	PARP1	PARP1	0
755	PARP2	PARP1	0
756	AHCY	PARP1	0
757	APEX1	PARP1	0
758	APEX2	PARP1	0
759	MANF	PARP1	0
760	BLM	PARP1	0
761	INO80C	PARP1	0
762	CANX	PARP1	0
763	CARM1	PARP1	0
764	CBX3	PARP1	0
765	CCNH	PARP1	0
766	CCT4	PARP1	0
767	CCT5	PARP1	0
768	CETN2	PARP1	0
769	ERCC8	PARP1	0
770	COL1A2	PARP1	0
771	CRIP2	PARP1	0
772	DCLRE1A	PARP1	0
773	DCLRE1B	PARP1	0
774	DCLRE1C	PARP1	0
775	DDB1	PARP1	1
776	DDB2	PARP1	0
777	EIF4A3	PARP1	0
778	ALKBH3	PARP1	0
779	DMC1	PARP1	0
780	DNMT1	PARP1	0
781	TRDMT1	PARP1	0
782	DNMT3A	PARP1	0
783	DNMT3B	PARP1	0
784	DOT1L	PARP1	0
785	DUT	PARP1	0
786	DVL3	PARP1	0
787	E2F5	PARP1	0
788	EHMT1	PARP1	0
789	ERCC1	PARP1	0
790	ERCC2	PARP1	0
791	ERCC3	PARP1	0
792	ERCC4	PARP1	0
793	ERCC5	PARP1	0
794	ERCC6	PARP1	0
795	EXO1	PARP1	0
796	EZH2	PARP1	0
797	FANCA	PARP1	0
798	FANCC	PARP1	0
799	FANCD2	PARP1	0
800	FANCE	PARP1	0
801	FANCF	PARP1	0
802	FANCG	PARP1	0
803	FAP	PARP1	0
804	FEN1	PARP1	0
805	NEIL3	PARP1	0
806	ENDOV	PARP1	0
807	XRCC6	PARP1	0
808	G3BP1	PARP1	0
809	GTF2H2	PARP1	0
810	GTF2H3	PARP1	0
811	GTF2H4	PARP1	0
812	H2AFX	PARP1	0
813	H2AFZ	PARP1	0
814	HDAC1	PARP1	0
815	HDAC10	PARP1	0
816	HDAC11	PARP1	0
817	HDAC2	PARP1	0
818	HDAC4	PARP1	0
819	HDAC6	PARP1	0
820	HNRNPA2B1	PARP1	0
821	PRMT1	PARP1	0
822	HSPD1	PARP1	0
823	HSPE1	PARP1	0
824	RPA4	PARP1	0
825	HUS1	PARP1	0
826	IARS	PARP1	0
827	IFNGR2	PARP1	0
828	ILF2	PARP1	0
829	KDELR2	PARP1	0
830	KIAA0101	PARP1	0
831	KPNA2	PARP1	0
832	LDHA	PARP1	0
833	LIG1	PARP1	1
834	LIG3	PARP1	0
835	LIG4	PARP1	0
836	MAD2L2	PARP1	0
837	MBD1	PARP1	0
838	MBD2	PARP1	0
839	MBD3	PARP1	0
840	MBD4	PARP1	0
841	MCM3	PARP1	0
842	MECP2	PARP1	0
843	ALKBH2	PARP1	0
844	MGMT	PARP1	0
845	MLH1	PARP1	0
846	MLH3	PARP1	0
847	KMT2A	PARP1	0
848	MMP9	PARP1	0
849	MMS19	PARP1	0
850	MNAT1	PARP1	0
851	MPG	PARP1	0
852	MRE11A	PARP1	0
853	MRPL3	PARP1	0
854	MRPS12	PARP1	0
855	MSH2	PARP1	0
856	MSH3	PARP1	0
857	MSH4	PARP1	0
858	MSH5	PARP1	0
859	MSH6	PARP1	0
860	MTHFD2	PARP1	0
861	MUTYH	PARP1	0
862	NCBP2	PARP1	0
863	NEIL1	PARP1	0
864	NEIL2	PARP1	0
865	NONO	PARP1	0
866	NTHL1	PARP1	0
867	NUDT1	PARP1	0
868	NUP205	PARP1	0
869	OGG1	PARP1	0
870	OGT	PARP1	0
871	TUBB	PARP1	0
872	PAFAH1B3	PARP1	0
873	PAICS	PARP1	0
874	PCNA	PARP1	1
875	PMS1	PARP1	0
876	PMS2	PARP1	0
877	POLB	PARP1	0
878	POLD1	PARP1	0
879	POLE	PARP1	0
880	POLG	PARP1	0
881	POLH	PARP1	0
882	POLI	PARP1	0
883	POLK	PARP1	0
884	POLL	PARP1	0
885	POLM	PARP1	0
886	POLN	PARP1	0
887	POLQ	PARP1	0
888	PPP2R5C	PARP1	0
889	PRDX2	PARP1	0
890	PRDX4	PARP1	0
891	PSMA1	PARP1	0
892	PSMC4	PARP1	0
893	PSME2	PARP1	0
894	PTMA	PARP1	0
895	RAD1	PARP1	0
896	RAD17	PARP1	0
897	RAD18	PARP1	0
898	RAD23A	PARP1	0
899	RAD23B	PARP1	0
900	RAD50	PARP1	0
901	RAD51	PARP1	1
902	RAD51C	PARP1	0
903	RAD51B	PARP1	0
904	RAD51D	PARP1	0
905	RAD52	PARP1	0
906	RAD54B	PARP1	0
907	RAD54L	PARP1	0
908	RAD9A	PARP1	0
909	RBM4	PARP1	0
910	RECQL4	PARP1	0
911	REV1	PARP1	0
912	REV3L	PARP1	0
913	RFC4	PARP1	0
914	RPA1	PARP1	0
915	RPA2	PARP1	0
916	RPA3	PARP1	0
917	RPL13	PARP1	0
918	RPL27	PARP1	0
919	RPL35	PARP1	0
920	RRM2B	PARP1	0
921	SDHC	PARP1	0
922	SETD7	PARP1	0
923	KMT5A	PARP1	0
924	HLTF	PARP1	0
925	SMARCA4	PARP1	0
926	SMUG1	PARP1	0
927	SND1	PARP1	0
928	SNRPE	PARP1	0
929	SNRPF	PARP1	0
930	SOX4	PARP1	0
931	SPO11	PARP1	0
932	SSBP1	PARP1	0
933	SSR1	PARP1	0
934	SUV39H1	PARP1	0
935	SUV39H2	PARP1	0
936	TARS	PARP1	0
937	TDG	PARP1	0
938	TDP1	PARP1	0
939	TMEM30A	PARP1	0
940	TOP2A	PARP1	0
941	TP53BP1	PARP1	0
942	TPX2	PARP1	0
943	HSP90B1	PARP1	0
944	TRAF4	PARP1	0
945	TREX1	PARP1	0
946	TREX2	PARP1	0
947	TSTA3	PARP1	0
948	UBE2A	PARP1	0
949	UBE2B	PARP1	0
950	UBE2N	PARP1	0
951	UBE2S	PARP1	0
952	UBE2V2	PARP1	0
953	UNG	PARP1	0
954	WRN	PARP1	0
955	XAB2	PARP1	1
956	XPA	PARP1	0
957	XPC	PARP1	0
958	XRCC1	PARP1	1
959	XRCC2	PARP1	0
960	XRCC3	PARP1	0
961	XRCC4	PARP1	0
962	XRCC5	PARP1	0
963	ZDHHC17	PARP1	0
